# Supplementary material
Source: PubMed Central journal article supplement (PMC5044803)
Supplement: NIHMS812703-supplement-3.pdf [file NIHMS812703-supplement-3.pdf]

## Supplemental materials

### **Comparison of catalytic site point mutations and domain deletions suggests that the exonuclease domain of Rrp44 has non-catalytic functions.**

To investigate whether the exonuclease domain of Rrp44 had any non-catalytic functions we compared the effect of a mutation in the exonuclease active site (*rrp44-exo<sup>-</sup>*) to the effect of completely deleting the exonuclease domain (*rrp44-Δexo*). While both the *rrp44-exo<sup>-</sup>* and *rrp44-Δexo* mutations cause a slow growth as previously reported (Dziembowski et al., 2007; Lebreton et al., 2008; Schaeffer et al., 2009; Schneider et al., 2009), the phenotype caused by deletion of exonuclease domain is much more severe (Supplemental figure S1A). These results indicate that the exonuclease domain has a noncatalytic function, although they do not indicate what the noncatalytic function might be.

### **Overexpressing Rrp44 alleles suggest that the exonuclease domain contributes to interaction with the RNA exosome core.**

To better understand which interactions are critical for RNA exosome function *in vivo*, we choose to overexpress catalytically inactive Rrp44. We reasoned (supplemental figure S1B) that the catalytically inactive subunit of a complex should displace the endogenous subunit and result in a dominant negative phenotype. To validate this reasoning we used a galactose-inducible promoter to conditionally overexpress either wild-type Rrp44, a catalytically inactive Rrp44 (Rrp44-endo<sup>-</sup>-exo<sup>-</sup>) that lacks both endo and exonuclease activities. As expected, the catalytically inactive Rrp44 caused slow growth (Supplemental figure 1C). We also overexpressed an additional Rrp44 (Rrp44-CR3-endo<sup>-</sup>-exo<sup>-</sup>) that combines the catalytic site mutations with a mutation previously shown to inhibit RNA exosome association (Schaeffer et al., 2012). This catalytically inactive Rrp44 that was unable to interact with exo9 had no effect on growth. Western blot analysis indicated that each mutant was overexpressed to a similar extent (Supplemental figure 1D). These results suggest that overexpression of the catalytically inactive mutant is indeed detrimental because it displaces the endogenous Rrp44 from the RNA exosome.

The endonuclease domain of Rrp44 has previously been shown to be a major exosome interacting domain. To test whether the exonuclease domain of Rrp44 is also important for the interaction with the RNA exosome core, we overexpressed just the catalytically inactive endonuclease domain (Rrp44-endo<sup>-</sup>-Δexo). Both Rrp44-endo<sup>-</sup>-Δexo and Rrp44-endo<sup>-</sup>-exo<sup>-</sup> lack exonuclease activity, but in the latter the exonuclease domain is available to serve non-catalytic functions, while this domain is entirely deleted in the former. If the endonuclease domain were the only critical interaction site between Rrp44 and the core, overexpression of Rrp44-endo<sup>-</sup>-Δexo and Rrp44-endo<sup>-</sup>-exo<sup>-</sup> would similarly displace the endogenous Rrp44 and cause growth inhibition. However, we did not observe any dominant negative growth defect when Rrp44-endo<sup>-</sup>-Δexo was overexpressed (Supplemental figure 1E). The expression level of *rrp44-Δexo* can not be directly compared to full length Rrp44 alleles because the antibody was raised against full length Rrp44. Therefore, we used C-terminal TAP-tagged variants of *RRP44* alleles to assess the expression levels by Protein A antibody. Overexpression of Rrp44-endo<sup>-</sup>-Δexo-TAP gives a similar result to untagged variants (Supplemental figure 1E). Western

blot analysis with anti TAP antibodies indicated that the full length Rrp44-endo<sup>-</sup>-exo<sup>-</sup> and Rrp44-endo<sup>-</sup>-Δexo are expressed at similar levels (Supplemental Figure 1E). Overexpression of any of the full length Rrp44 constructs also caused the accumulation of degradation intermediates, but these degradation products are similar for wild-type Rrp44 and any of the mutants tested (Supplemental Figure 1C and E). These degradation products detected by the antibody to the C-terminal TAP tag do not possess the N-terminal region and are unlikely to efficiently associate with the exo-9 core. The results from these overexpression experiments are consistent with the exonuclease domain of Rrp44 contributing to exo-9 interaction, and led us to further pursue this hypothesis as described in the main text.

Table S1: Strains used.

| Name    | Genotype                                                                                                    | reference                    |
|---------|-------------------------------------------------------------------------------------------------------------|------------------------------|
| BY4741  | <i>MATa/leu2-Δ0/ura3-Δ0/his3Δ1/met15Δ0</i>                                                                  | Giaever et al., 2002         |
| yAV1115 | <i>MATa/leu2-Δ0/ura3-Δ0/his3Δ-Δ1/rrp44Δ::NEO [RRP44, URA3]</i>                                              | Schaeffer et al., 2009       |
| yAV1143 | <i>MATa/trp1/ura3/leu2/dcp1-2ts::TRP1/rrp44::NEO [RRP44, URA3]</i>                                          | Schaeffer and van Hoof, 2011 |
| yAV1117 | <i>MATa/leu2-Δ0/ura3-Δ0/his3Δ1/met15Δ0 /rrp43::myc::HIS3</i>                                                | Schaeffer et al., 2012       |
| yAV1137 | <i>MATa/leu2-Δ0/ura3-Δ0/his3-Δ1/rrp44Δ::HYG/rrp6Δ::NEO [RRP44, URA3]</i>                                    | Schaeffer et al., 2012       |
| yAV1234 | <i>MATa/ura3-Δ0/leu2-Δ0/his3-Δ1/rrp41Δ::NEO [RRP41, URA3] [RRP41, LEU2]</i>                                 | Wasmuth and Lima, 2012       |
| yAV1244 | <i>MATa/ura3-Δ0/leu2-Δ0/his3-Δ1/rrp45Δ::NEO [RRP45, URA3] [RRP45, LEU2]</i>                                 | Wasmuth and Lima, 2012       |
| yAV1420 | <i>MATa/rrp44-20/trm6-504/gcn2-101/his1-29/ura3-52::HIS4-lacZ/ino1</i>                                      | Kadaba et al., 2004          |
| yAV1634 | <i>MATa/ura3-Δ0/leu2-Δ0/his3-Δ1/rrp44Δ::NEO/trp1Δ::hisG [RRP44, LEU2]</i>                                   | This study                   |
| yAV1642 | <i>MATa/ura3-Δ0/leu2-Δ0/his3-Δ1/rrp44Δ::NEO/rrp41Δ::NEO/trp1Δ::hisG [RRP44, URA3] [RRP41, TRP1]</i>         | This study                   |
| yAV1751 | <i>MATa/ura3-Δ0/leu2-Δ0/his3-Δ1/rrp44Δ::NEO/rrp45Δ::NEO/trp1Δ::hisG [RRP44, LEU2] [RRP45, URA3]</i>         | This study                   |
| yAV1713 | <i>MATa/ura3-Δ0/leu2-Δ0/his3-Δ1/rrp44Δ::NEO/rrp41Δ::NEO/trp1Δ::hisG [RRP44, LEU2] [RRP41, URA3]</i>         | This study                   |
| yAV1714 | <i>MATa/ura3-Δ0/leu2-Δ0/his3-Δ1/rrp44Δ::NEO/rrp41Δ::NEO/trp1Δ::hisG [rrp44-da, LEU2] [RRP41, URA3]</i>      | This study                   |
| yAV1715 | <i>MATa/ura3-Δ0/leu2-Δ0/his3-Δ1/rrp44Δ::NEO/rrp41Δ::NEO/trp1Δ::hisG [rrp44-CR3, LEU2] [RRP41, URA3]</i>     | This study                   |
| yAV1716 | <i>MATa/ura3-Δ0/leu2-Δ0/his3-Δ1/rrp44Δ::NEO/rrp41Δ::NEO/trp1Δ::hisG [rrp44-exo-, LEU2] [RRP41, URA3]</i>    | This study                   |
| yAV1717 | <i>MATa/ura3-Δ0/leu2-Δ0/his3-Δ1/rrp44Δ::NEO/rrp41Δ::NEO/trp1Δ::hisG [rrp44-endo-, LEU2] [RRP41, URA3]</i>   | This study                   |
| yAV1718 | <i>MATa/ura3-Δ0/leu2-Δ0/his3-Δ1/rrp44Δ::NEO/rrp41Δ::NEO/trp1Δ::hisG [rrp44-endo-da, LEU2] [RRP41, URA3]</i> | This study                   |
| yAV1966 | <i>MATa/rrp44Δ::NEO/trm6-504/gcn2-101/his1-29/ura3-52::HIS4-lacZ/ino1/leu2-Δ0 [RRP44, URA3]</i>             | This study                   |

Table S2: plasmids used.

| Name    | Short description   | Description                                                                     | Marker | reference                    |
|---------|---------------------|---------------------------------------------------------------------------------|--------|------------------------------|
| pAV952  | pNKY1009            | for generation of trp1Δ::hisG strain                                            | NA     | Alani et al., 1987           |
| pAV948  | pAD1                | for generation of leu2Δ0 strains                                                | NA     | Brachmann et al., 1998       |
| pAV241  | HIS3-Rz-stop        | HIS3-Hammerhead ribozyme-stop reporter                                          | URA3   | Meaux and van Hoof, 2006     |
| pAV958  | rrp44-CR3           | RRP44 promoter, RRP44 ORF (C47S, C52S, C55S)                                    | LEU2   | Schaeffer et al., 2009       |
| pAV503  | rrp44-endo-         | RRP44 promoter, RRP44 ORF (D171A)                                               | LEU2   | Schaeffer et al., 2009       |
| pAV501  | rrp44-exo-          | RRP44 promoter, RRP44 ORF (D551N)                                               | LEU2   | Schaeffer et al., 2009       |
| pAV344  | RRP44               | RRP44 promoter, RRP44 ORF 1-1001                                                | LEU2   | Schaeffer et al., 2009       |
| pAV777  | rrp44-yrd           | RRP44 promoter, RRP44 ORF (Y40A, R42A, D44A)                                    | LEU2   | Schaeffer and van Hoof, 2011 |
| pAV189  | HIS3-nonstop        | HIS3 nonstop reporter                                                           | URA3   | van Hoof et al., 2002        |
| pAV361  | RRP44               | RRP44 promoter, RRP44 ORF                                                       | URA3   | Wasmuth and Lima, 2012       |
| pAV1085 | rrp41-L             | RRP41 promoter, rrp41-L (GESEGESEGEL inserted after K62)                        | LEU2   | Wasmuth and Lima, 2012       |
| pAV1043 | RRP41               | RRP41 promoter, RRP41 ORF                                                       | URA3   | Wasmuth and Lima, 2012       |
| pAV1039 | RRP41               | RRP41 promoter, RRP41 ORF                                                       | LEU2   | Wasmuth and Lima, 2012       |
| pAV1044 | RRP45               | RRP45 promoter, RRP45 ORF                                                       | URA3   | Wasmuth and Lima, 2012       |
| pAV883  | da fragment         | da fragment (R439A, R440A, H466A, L500A, D602A) synthesized by GENEWIZ          | NA     | This study                   |
| pAV959  | rrp44-CR3-TAP       | RRP44 promoter, RRP44 ORF (C47S, C52S, C55S), TAP                               | LEU2   | This study                   |
| pAV921  | rrp44-da-TAP        | RRP44 promoter, RRP44 ORF (R439A, R440A, H466A, L500A, D602A), TAP              | LEU2   | This study                   |
| pAV920  | rrp44-yrd-TAP       | RRP44 promoter, RRP44 ORF (Y40A, R42A, D44A), TAP                               | LEU2   | This study                   |
| pAV917  | RRP44-TAP           | RRP44 promoter, RRP44 ORF, TAP                                                  | LEU2   | This study                   |
| pAV912  | rrp44-CR3-da        | RRP44 promoter, RRP44 ORF (C47S, C52S, C55S, R439A, R440A, H466A, L500A, D602A) | LEU2   | This study                   |
| pAV911  | rrp44-endo-da       | RRP44 promoter, RRP44 ORF (D171A, R439A, R440A, H466A, L500A, D602A)            | LEU2   | This study                   |
| pAV910  | rrp44-da            | RRP44 promoter, RRP44 ORF (R439A, R440A, H466A, L500A, D602A)                   | LEU2   | This study                   |
| pAV1109 | rrp45-L             | RRP45 promoter, rrp45-L (GESEGESEGEL inserted after G94)                        | TRP1   | This study                   |
| pAV1089 | rrp41-L             | RRP41 promoter, rrp41-L (GESEGESEGEL inserted after K62)                        | TRP1   | This study                   |
| pAV1079 | rrp44-da-endo-exo-  | GAL promoter, RRP44 ORF (D171A, R439A, R440A, H466A, L500A, D551N, D602A)       | MET15  | This study                   |
| pAV1077 | rrp44-CR3-endo-exo- | GAL promoter, RRP44 ORF (C47S, C52S, C55S, D171A, D551N)                        | MET15  | This study                   |
| pAV1076 | rrp44-CR3           | GAL promoter, RRP44 ORF (C47S, C52S, C55S)                                      | MET15  | This study                   |
| pAV1074 | rrp44-da            | GAL promoter, RRP44 ORF (R439A, R440A, H466A, L500A, D602A)                     | MET15  | This study                   |
| pAV1058 | rrp44-endo-exo-     | GAL promoter, RRP44 ORF (D171A, D551N)                                          | MET15  | This study                   |
| pAV1053 | RRP44               | GAL promoter, RRP44 ORF                                                         | MET15  | This study                   |
| pAV1049 | RRP41               | RRP41 promoter, RRP41 ORF                                                       | TRP1   | This study                   |
| pAV1033 | rrp44-endo-Δexo     | GAL promoter, residues 1-235 of RRP44 ORF (D171A)                               | MET15  | This study                   |
| pAV1032 | rrp44-Δexo          | GAL promoter, residues 1-235 of RRP44 ORF                                       | MET15  | This study                   |
| pAV1029 | rrp44-exo-da        | RRP44 promoter, RRP44 ORF (R439A, R440A, H466A, L500A, D551N, D602A)            | LEU2   | This study                   |
| pAV1065 | RRP45               | RRP45 promoter, RRP45 ORF                                                       | TRP1   | This study                   |

Table S3: oligonucleotides used.

| Name                             | Short description | Sequence                                                                | Description                                          |
|----------------------------------|-------------------|-------------------------------------------------------------------------|------------------------------------------------------|
| <b>Northern blot probes</b>      |                   |                                                                         |                                                      |
| oAV224                           | SRP               | gtctagccgaggaagg                                                        |                                                      |
| oAV910                           | U14               | tcctaccgtggaaactgcg                                                     |                                                      |
| oAV911                           | pre U14           | gatactacagtatacgatcactc                                                 |                                                      |
| oAV1151                          | 5'ETS             | cgaacgacaagcctactcg                                                     |                                                      |
| oAV1233                          | 7S pre-rRNA       | tgagaaggaatgacgct                                                       |                                                      |
| oAV1234                          | tRNAiMET          | tcggttcgatccgaggacatcagggttatga                                         |                                                      |
| oAV1235                          | tRNAcaaLEU        | tggttgctaagagattcgaac                                                   |                                                      |
| oAV1278                          | 5S                | tcgcatggtcaccactaca                                                     |                                                      |
| <b>Site-directed mutagenesis</b> |                   |                                                                         |                                                      |
| oAV482                           | CR3 sense         | gatcggacatccaagtcttctagaagtagtagtaccagagtagccgcaaattgtcg                | RRP44 to rrp44-CR3                                   |
| oAV569                           | CR3 antisense     | cgacaatttgcggactcttggtactactctagaaagactgggatgcccgatc                    | RRP44 to rrp44-CR3                                   |
| oAV565                           | exo- sense        | ctccaggatgtgtcatatcaacgatgccctacatg                                     | RRP44 to rrp44-D551N                                 |
| oAV566                           | exo- antisense II | cgcatgtagggcatcgttgatatcaacacatcctggag                                  | RRP44 to rrp44-D551N                                 |
| oAV572                           | endo- sense       | cgattaatgacagaaacgcgctataaggaaaacctgtcaatgg                             | RRP44 to rrp44-D171A                                 |
| oAV573                           | endo- antisense   | ccatgacaggtttccttatagcgcgcttctgtcattaatcg                               | RRP44 to rrp44-D171A                                 |
| oAV847                           | YRD sense         | cgtaagagaacacgcgttagcttcggctatcccatgtcttcg                              | RRP44 to rrp44-yrd                                   |
| oAV848                           | YRD antisense     | cgaaagacatgggatagccgaagctaacgcgtgttctcttacg                             | RRP44 to rrp44-yrd                                   |
| <b>Cloning</b>                   |                   |                                                                         |                                                      |
| oAV1163                          | 3Rp44-F           | tagaggcaggtgccttgaacttagcttctctgaggtaaggccatg                           | cloning TAP-tagged RRP44 by homologous recombination |
| oAV1164                          | TAP3UTR-R         | cgtaatacgaactcactatagggcgaattgggtaccggccccctcgagtgccgtagaggtgtggtcaataa | cloning TAP-tagged RRP44 by homologous recombination |
| oAV1339                          | 41F               | atgcactagtaagtgagaattgtttgtttattt                                       | Cloning of RRP41 (SpeI/XhoI)                         |
| oAV1340                          | 41R               | atgcctcagttcatagctgaggagtataagc                                         | Cloning of RRP41 (SpeI/XhoI)                         |
| oAV1341                          | 45F               | atgcactagttgctgaaagagaattactgatg                                        | Cloning of RRP45 (SpeI/XhoI)                         |
| oAV1342                          | 45R               | atgcctcagatgacgatgacgaagttttgt                                          | Cloning of RRP45 (SpeI/XhoI)                         |

Supplemental movie (related to figure 1). The movie shows the large movement of the exonuclease domain of Rrp44 going from the channeling conformation to the direct access conformation. Grey: Rrrp44. Orange: exo-9 core. Black: RNA. Yellow: endonuclease active site (D171). Red: exonuclease active site (D551). Green: amino acids mutated in *rrp44-da* allele. The movie is linear interpolation of two exosome structures (PDB ID: 5C0W and 4IFD; (Makino et al., 2013a; Makino et al., 2015) by using UCSF chimera (Pettersen et al., 2004)

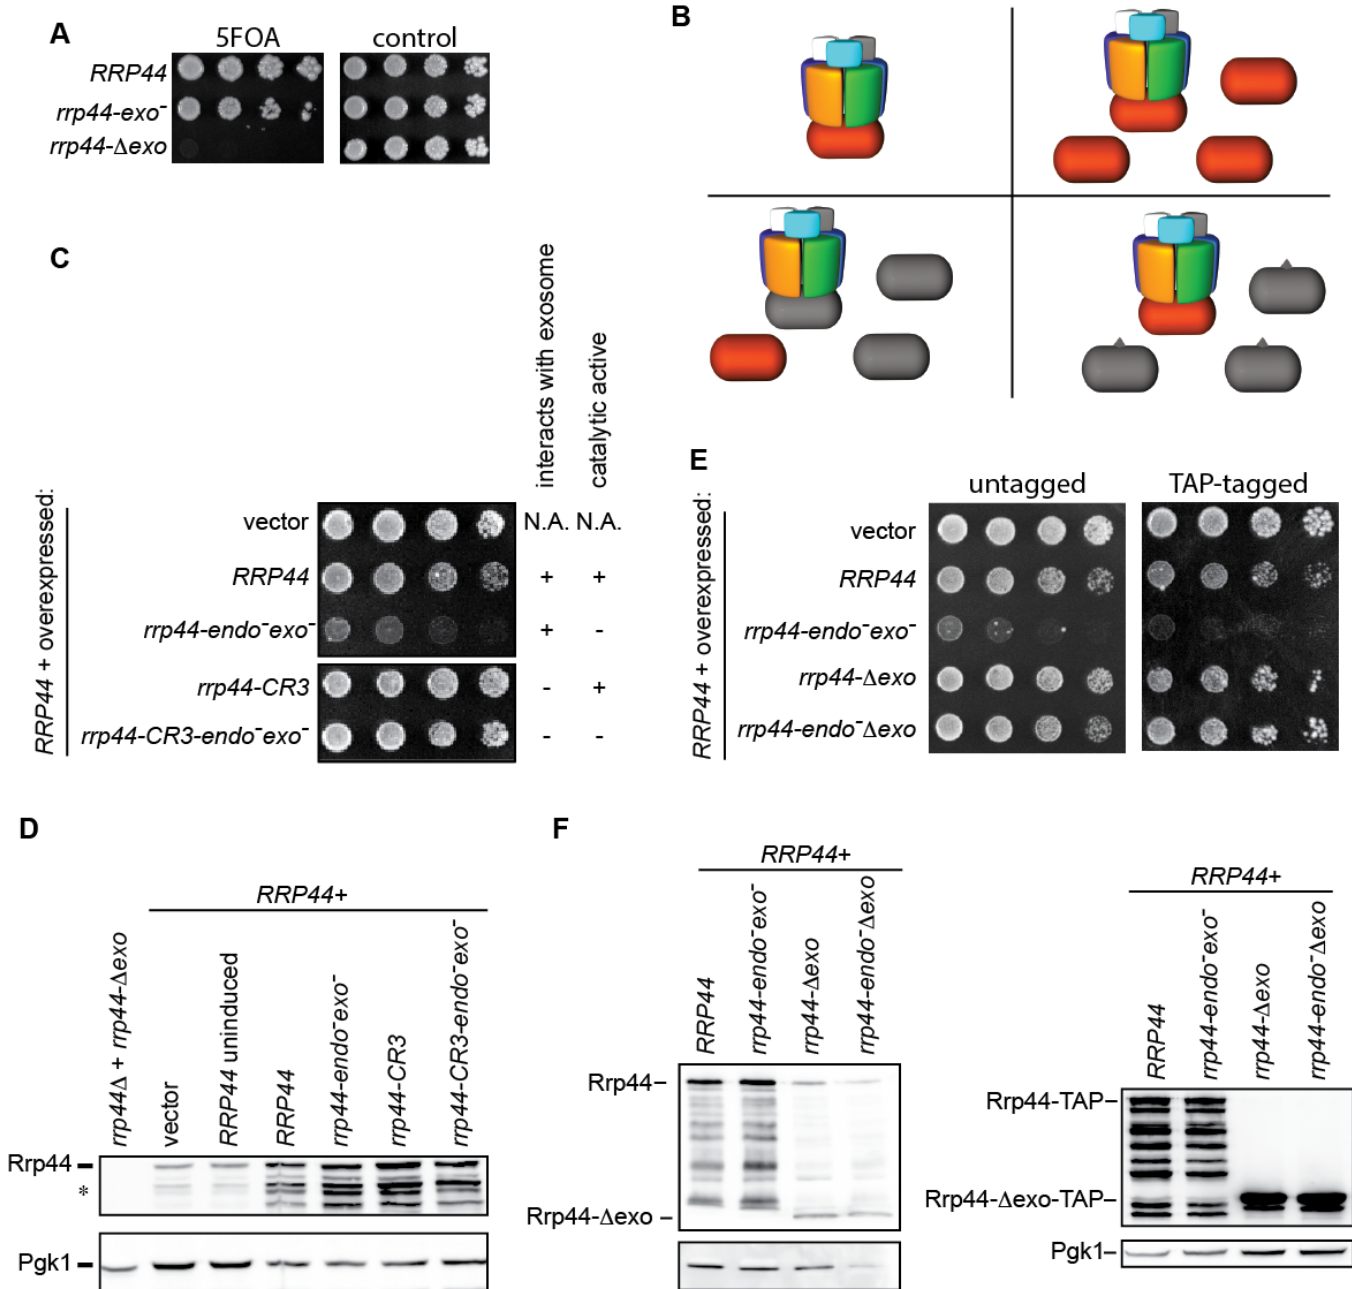

Supplemental figure S1 (related to figure 1). **A**. The effect on growth of deleting the exonuclease domain of Rrp44 (*rrp44-Δexo*) is much more severe than the effect of a point mutation inactivating the exonuclease domain (*rrp44-exo<sup>-</sup>*) **B**. Rationale behind overexpression experiments in C and E. Top left, normal RNA exosome. Top right: Overexpressing wild-type Rrp44 should not affect RNA exosome function. Bottom left: Overexpressing inactive Rrp44 should displace wild-type Rrp44 and inhibit RNA exosome function dominant negatively. Bottom right: Overexpressing inactive Rrp44 unable to interact with the RNA exosome should not displace wild-type Rrp44 and should not affect RNA exosome activity. Red oval: Active Rrp44. Grey oval: Catalytically inactive Rrp44. Grey triangle: Mutation that interferes with RNA exosome binding. **C**. Overexpression of catalytically inactive Rrp44 causes a dominant negative phenotype. Wild-type yeast strains

carrying various alleles of *RRP44* under a galactose inducible promoter were serially diluted and spotted on solid media containing galactose. No growth defect was observed on media containing glucose (data not shown). The white line between the third and fourth row indicates that lanes containing other irrelevant mutants were cut from the image. The five rows shown are from the same plate. **D, F, G.** Western blot analysis indicates mutant *RRP44* or *RRP44-TAP* alleles are overexpressed to similar extents. Cell lysates were subjected to western blot with  $\alpha$ -Rrp44 (untagged Rrp44),  $\alpha$ -Protein A (TAP-tagged Rrp44) and  $\alpha$ -Pgk1 (loading control) antibodies. The position of full length Rrp44 is indicated, as is the position of several degradation products (\*). The first lane of panel D contains a lysate from a strain that expresses only a truncated Rrp44. The absence of the signals for both full length Rrp44 and degradation products in this lane indicate that these signals are specific. The third lane of panel D is from the same strain as lane four but grown in glucose containing (noninducing) medium. Note that in the strain that contains endogenous Rrp44 and overexpressed *rrp44- $\Delta$ exo* (panel F lane 3) the band intensities for the two proteins are approximately equal even though the truncated Rrp44 likely lacks many of the epitopes recognized by the polyclonal  $\alpha$ Rrp44 antisera. **(E)** Overexpression of catalytically inactive endonuclease domain (*rrp44-endo- $\Delta$ exo*) does not cause a dominant negative phenotype.



A

|                |                                                                           |     |
|----------------|---------------------------------------------------------------------------|-----|
| <b>ScRrp44</b> | GQLAPSSVD-PQSSSTQNVFVILMDKCLPKVRIRT <b>RR</b> AAELLDKRI                   | 450 |
| <b>SpDis3</b>  | GHVDNATIAQSKGGSQQTVLLTPMDRRVVKIRFRT <b>RO</b> APRLVGRRI                   | 421 |
| <b>hDis3</b>   | GMLSKSDIK-----ESRRHLFTPADKRIPRIRIET <b>RO</b> ASTLEGRRI                   | 398 |
| <b>hDis3L</b>  | GMLSKSDIK-----ESRRHLFTPADKRIPRIRIET <b>RO</b> ASTLEGRRI                   | 368 |
| <b>DmDis3</b>  | GILQPSLIE-----DTNRHIFVPADRKIPRIRIET <b>RO</b> AAMLQ <b>Q</b> RI           | 405 |
| <b>DmDis3L</b> | GILQPSLIE-----DTNRHIFVPADRKIPRIRIET <b>RO</b> AAMLQ <b>Q</b> RI           | 405 |
|                |                                                                           |     |
| <b>ScRrp44</b> | LG <b>H</b> FVRDLGTIESAQAETEALLLEHDVEYRPFSSK <b>V</b> LECLPAEGHD          | 509 |
| <b>SpDis3</b>  | EG <b>H</b> FVRDLGEMETKEAETEALLLEYDVQHRPFPKAV <b>L</b> DCLPEEGHN          | 481 |
| <b>hDis3</b>   | NG <b>H</b> FVRNLGDVGEKETETEVLLLEHDVPHQPFSQAV <b>L</b> SFLP-----          | 453 |
| <b>hDis3L</b>  | NG <b>H</b> FVRNLGDVGEKETETEVLLLEHDVPHQPFSQAV <b>L</b> SFLP-----          | 423 |
| <b>DmDis3</b>  | HG <b>H</b> FVRSLGPLGDMATENEVIL <b>L</b> EHDPHCKFSDEV <b>L</b> SFLP-----  | 460 |
| <b>DmDis3L</b> | HG <b>H</b> FVRSLGPLGDMATENEVIL <b>L</b> EHDPHCKFSDEV <b>L</b> SFLP-----  | 460 |
|                |                                                                           |     |
| <b>ScRrp44</b> | DAEGAARGTSVYLVDKRID <b>M</b> LPM <b>L</b> LGTDLCSLKPYVDRFAFSVIWE          | 629 |
| <b>SpDis3</b>  | DSEAASRGTTVYLVDKRID <b>M</b> LPM <b>L</b> LGTDLCSLRPYVERFAFSCIWE          | 594 |
| <b>hDis3</b>   | DQESARRGTTVYLCEKRID <b>M</b> VP <b>E</b> LLSSNLC <b>S</b> LKCDVDRLAFSCIWE | 565 |
| <b>hDis3L</b>  | DQESARRGTTVYLCEKRID <b>M</b> VP <b>E</b> LLSSNLC <b>S</b> LKCDVDRLAFSCIWE | 535 |
| <b>DmDis3</b>  | DMEAAARGTTVYLVGKRID <b>M</b> VP <b>E</b> LLSSNLC <b>S</b> LVGGVERFAFSCVWE | 572 |
| <b>DmDis3L</b> | DMEAAARGTTVYLVGKRID <b>M</b> VP <b>E</b> LLSSNLC <b>S</b> LVGGVERFAFSCVWE | 572 |

B

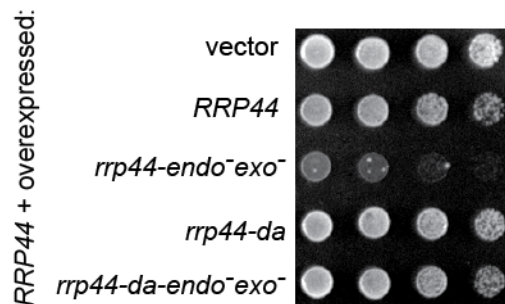

C

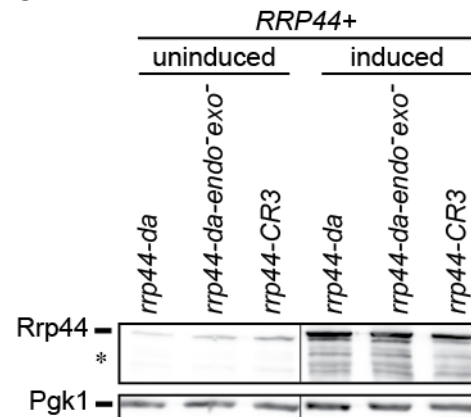

Supplemental figure S2 (related to figure 1). **A**. Sequence alignment of part of Rrp44 with homologs from *Schizosaccharomyces pombe* (SpDis3), human (hDis3 and hDis3L) and *Drosophila melanogaster* (DmDis3 and DmDis3L). Blue and purple boxes highlight residues in the CSD2 domain and RNB domain, respectively, that are mutated in the *rrp44-da* allele. **B**. *rrp44-da-endo<sup>-</sup>exo<sup>-</sup>* is not dominant negative when overexpressed. This is consistent with the results from co-immunoprecipitation that show that the *rrp44-da* mutation affects interaction with the RNA exosome core. Wild-type yeast strains carrying *RRP44* variants under a galactose inducible promoter were serially diluted and spotted on solid media containing galactose. No growth defect was observed on media containing glucose (data not shown). **C**. The *rrp44-da*, and *rrp44-da-endo<sup>-</sup>exo<sup>-</sup>* mutants were successfully overexpressed. The black line between the third and fourth lane indicates that a lane containing an irrelevant mutant was cut from the image. The lanes shown are from the same blot.

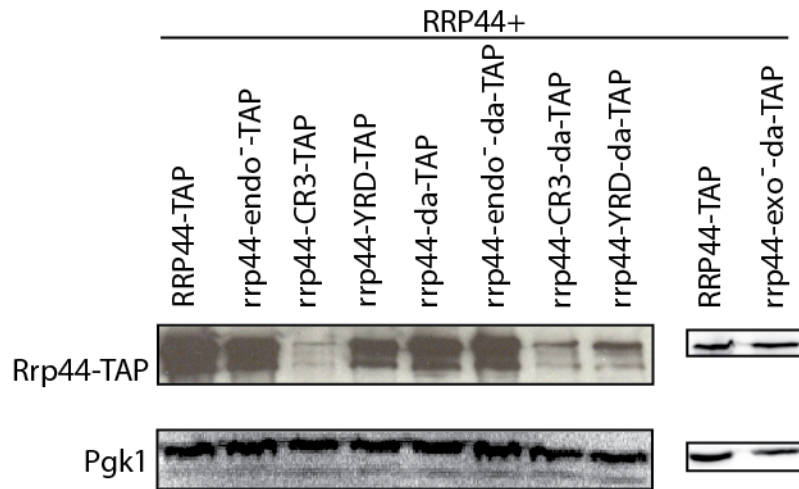

Figure S3: related to figures 2 and 3. The lethality of *rrp44-CR3-da*, *rrp44-yrd-da*, and *rrp44-exo<sup>-</sup>-da* is not correlated with their expression level. Specifically, the lethal *rrp44-CR3-da-TAP*, and *rrp44-yrd-da-TAP* expressed at higher levels than *rrp44-CR3-TAP*, the slow growing *rrp44-endo<sup>-</sup>-da-TAP* is expressed similar to either single mutant (*rrp44-endo<sup>-</sup>-TAP* and *rrp44-da-TAP*) and the lethal *rrp44-exo<sup>-</sup>-da-TAP* is expressed similar to wild-type *RRP44-TAP*.

## **SUPPLEMENTAL REFERENCES CITED**

Giaever, G., Chu, A.M., Ni, L., Connelly, C., Riles, L., Veronneau, S., Dow, S., Lucau-Danila, A., Anderson, K., Andre, B., *et al.* (2002). Functional profiling of the *Saccharomyces cerevisiae* genome. *Nature* 418, 387-391.

Pettersen, E.F., Goddard, T.D., Huang, C.C., Couch, G.S., Greenblatt, D.M., Meng, E.C., and Ferrin, T.E. (2004). UCSF Chimera--a visualization system for exploratory research and analysis. *J Comput Chem* 25, 1605-1612.
